# Supplementary material for: Late Pliocene lakes and soils: a global data set for the analysis of climate feedbacks in a warmer world
Source: Copernicus journal article supplement (doi:10.5194/cp-10-167-2014), 2014-01-23
Supplement: Supplementary file 2 [file Supplementary Information 2 - soil parameters.docx]

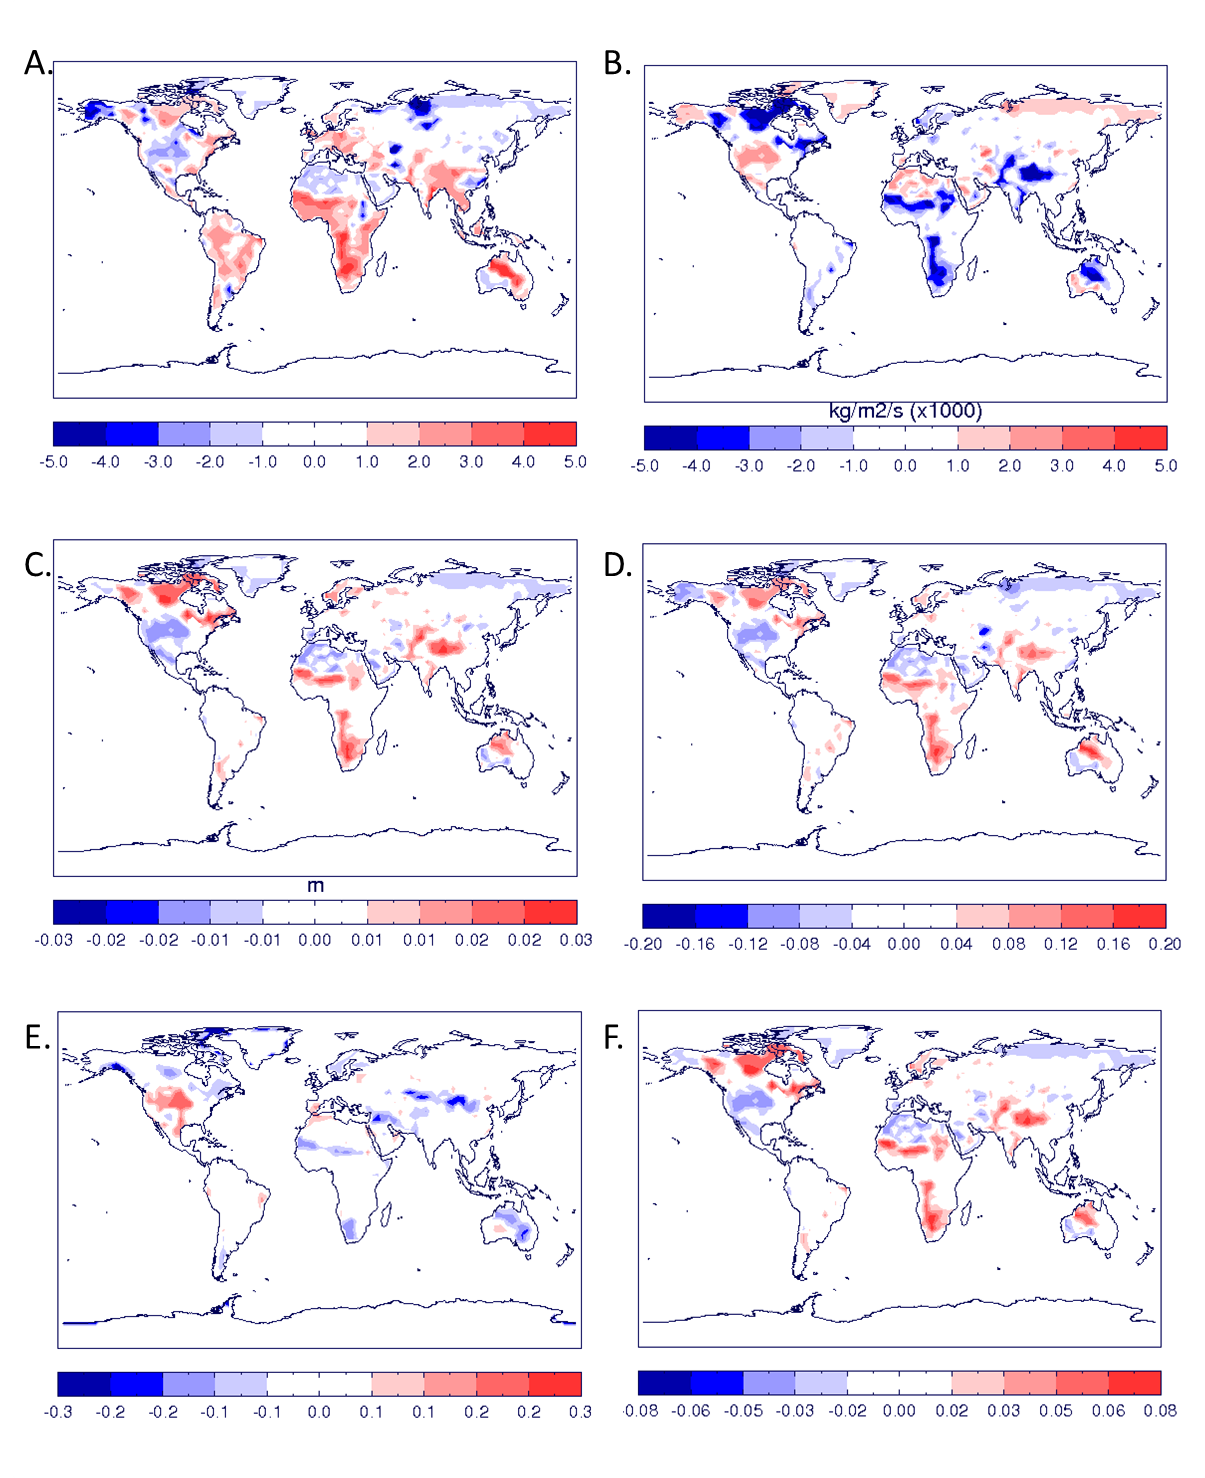


Supplementary figure X. Differences in soil parameters between the PRISM3D + soils experiment and PRISM3D Control experiment. A. Clapp Hornberger exponent, B. Saturated soil hydraulic conductivity A, C. Saturated soil water suction, D. Volumetric soil moisture concentration at critical point, E. Soil albedo and F. Volumetric soil moisture concentration at saturation point.
