# Supplementary material for: Late Pliocene lakes and soils: a global data set for the analysis of climate feedbacks in a warmer world
Source: Copernicus journal article supplement (doi:10.5194/cp-10-167-2014), 2014-01-23
Supplement: Supplementary file 3 [file Supplementary Information 3 - dry lakes.docx]

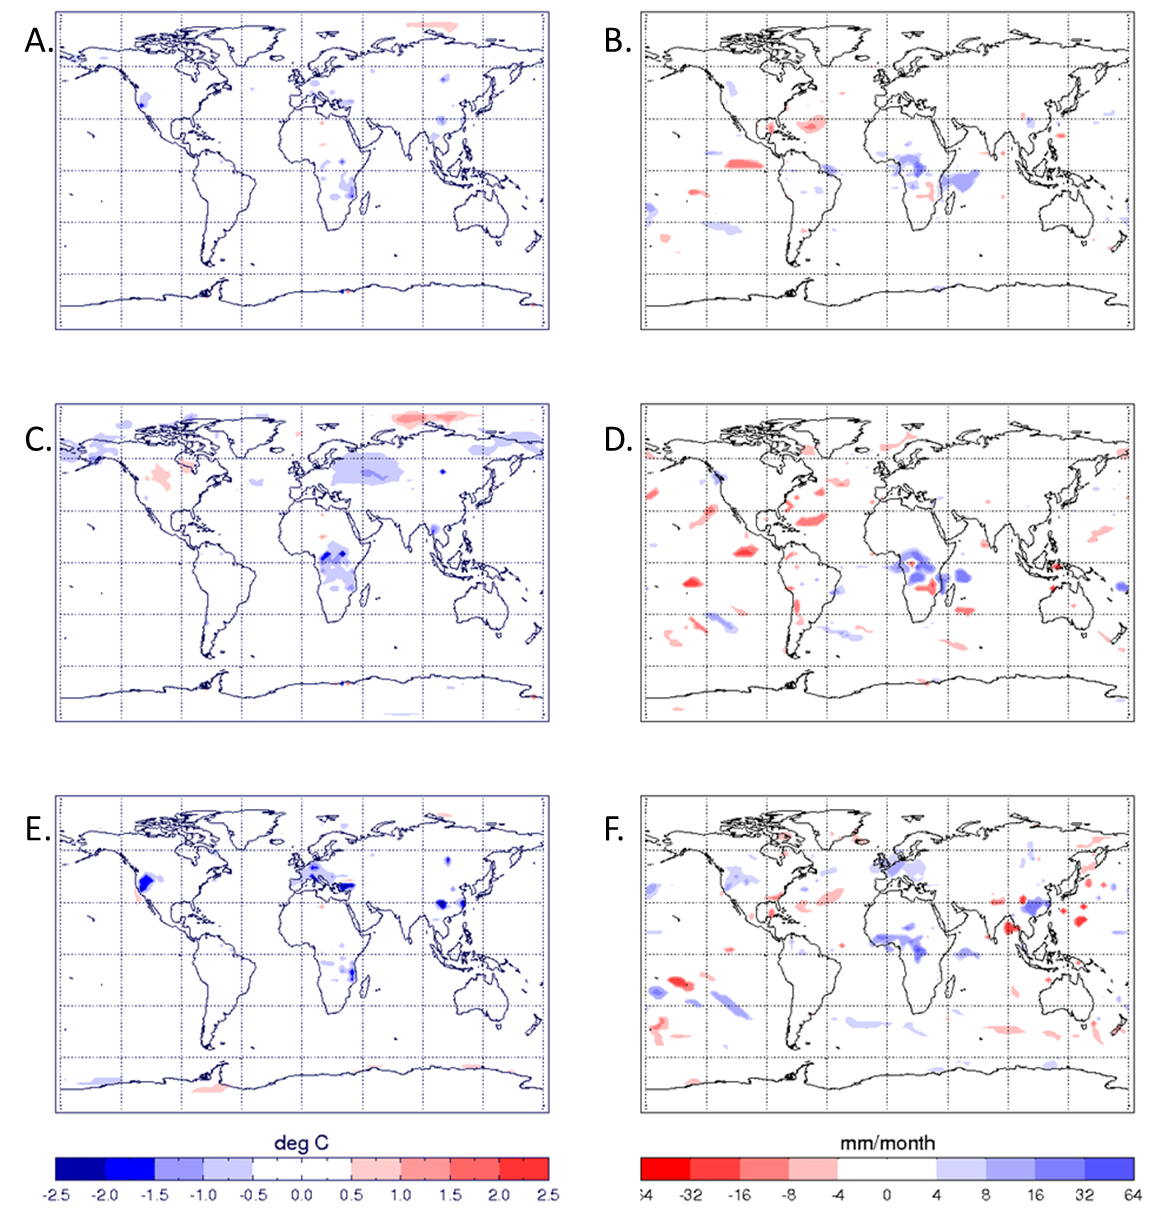


Supplementary figure X. Temperature (A, C & E) and precipitation (B, D & F) anomalies for the PRISM3D + dry-lakes experiment relative to the standard PRISM3D control run, all results shown are at the 0.1% significance level. A. MAT, B. MAP, C. DJF temperature, D. DJF precipitation, E. JJA temperature and F. JJA precipitation.
