# Supplementary material for: Late Pliocene lakes and soils: a global data set for the analysis of climate feedbacks in a warmer world
Source: Copernicus journal article supplement (doi:10.5194/cp-10-167-2014), 2014-01-23
Supplement: Supplementary file 4 [file Supplementary Tables - 1 and 2 (with reference list).xlsx]

## Sheet: Table 1 Soils data
Location	Location name	Latitude	Longitude	Oldest age (Ma)	Youngest age (Ma)	Assigned soil order	Reference
1	Fish Creek, CA	34.15	-116.8	3.7	2.5	Aridisol	Peryam et al., 2008
2	Black Mountain	32.9	-117.1	5.3	2.6	Alfisol	Abbott, 1981
3	San Pedro Valley	31.45	-110.1	3.7	2.6	Aridisol	Smith et al., 1993
4	Wild Horse Canyon	33	-107.3	3.6	2.6	Vertisol	Mack et al., 2006
5	Apache Canyon	32.9	-107.3	3.6	2.6	Vertisol	Mack et al., 2006
6	Upper Garfield	32.8	-107.3	3.6	2.6	Vertisol	Mack et al., 2006
7	Hatch Siphon	32.7	-107.3	3.6	2.6	Vertisol	Mack et al., 2006
8	Rincon Arroyo	32.7	-107	3.6	2.6	Vertisol	Mack et al., 2006
9	Lucero Arroyo	32.5	-106.9	3.6	2.6	Vertisol	Mack et al., 2006
10	Cedar Hill	32.5	-107	3.6	2.6	Vertisol	Mack et al., 2006
11	Carrolitos Graben	32.35	-107	3.6	2.6	Vertisol	Mack et al., 2006
12	Picacho Mount, NM	32.3	-106.9	3.6	2.6	Vertisol	Mack et al., 2006
13	Alamo Arroyo	31.45	-105.8	3.4	2.5	Vertisol	Gustavson, 1991
14	Arroyo Diablo	31.2	-105.75	3.4	2.5	Vertisol	Gustavson, 1991
15	Nealy Arroyo	31.1	-105.6	3.4	2.5	Vertisol	Gustavson, 1991
16	Amapa	2	-50.75	5.33	2.6	Ultisol	Vann, 1963
17	Martins	-6.1	-37.9	5.33	2.6	Oxisol	Mabesoone and Lobo, 1980
18	Mamanguape	-6.655	-35.1	5.33	2.6	Oxisol	Mabesoone and Lobo, 1980
19	El Infiernillo	-26.5	-66	3.4	3.3	Aridisol	Kleinert and Strecker, 2001
20	Bachicha	-37.9	-58.25	5.33	2.6	Alfisol	Osterrieth and Martínez, 1993
21	Chapadmalal	-38.1	-57.7	5.33	2.6	Alfisol	Genise, 1997
22	Tapera	-37.99	-57.6	5.33	2.6	Alfisol	Osterrieth and Martínez, 1993
23	Rio Cubillas	37.3	-3.5	3.6	2.6	Alfisol	Günster and Skowronek, 2001
24	Lannemezan	43.1	0.4	5.33	2.6	Alfisol	Icole, 1970
25	Tiberino Basin	42.75	12.4	3.6	2.6	Histosol	Basilici, 1997
26	Velenje	46.3	15.1	5.33	2.6	Histosol	Bechtel et al., 2003
27	Sparta	37	22.4	5.33	2.6	Ultisol	Paepe et al., 2004
28	Vatera	39	26.15	5.33	2.6	Oxisol	Kelepertsis, 2002
29	Rhodes	36.2	27.95	4	2	Alfisol	Quade et al., 1994
30	Kiev	50.7	30.9	3.3	2.9	Ultisol	Gerasimenko, 1993
31	Donbass	48	37.8	3.3	2.9	Ultisol	Gerasimenko, 1993
32	Ihlara-Selime	38.28	34.33	4.3	2.6	Aridisol	Gürel and Yıldız, 2007
33	Guzcloz	38.4	34.9	4.3	2.7	Alfisol	Gürel and Kadir, 2006
34	Incescu	38.6	35.2	4.3	2.7	Alfisol	Gürel and Kadir, 2006
35	Golan Hills	32.8	35.7	3.7	3.1	Vertisol	Graef et al., 1997
36	Nahan	31.1	76.75	3.5	3.3	Alfisol	Sangode and Bloemendal, 2004
37	Baikal	54	106.5	3.6	2.6	Alfisol	Mats et al., 2004
38	Jingchuan	35.29	107.37	3.6	2.6	Alfisol	Yang and Ding, 2010
39	Lingtai	35.01	107.51	3.6	2.6	Alfisol	Yang and Ding, 2010
40	Xifeng	35.9	107.9	3.4	2.4	Aridisol	Ding et al., 1998; Wu et al., 2006
41	Jiaxian	37.5	110.5	3.6	2.6	Aridisol	Ding et al., 1998
42	Hadar	11.17	40.4	3.5	3.15	Vertisol	Tiercelin, 1986; Campisano and Feibel, 2008
43	Kanapoi	2.3	36.06	4.2	3.4	Vertisol	Wynn, 2000
44	Knyssa	-34	23	5.33	2.6	Oxisol	Helgren and Butzer, 1977
45	Cape St Francis	-34.1	24.6	5.33	2.6	Oxisol	Helgren and Butzer, 1977
46	L'Ankaratra	-19.77	47.173	5.33	2.6	Histosol	Lenoble, 1949
47	Oodnadatta	-27.6	134.99	4	2	Aridisol	Fujioka et al., 2005
48	Coober Pedy	-28.7	134.5	4	2	Aridisol	Fujioka et al., 2005
49	Murray Basin	-34.22	140.7	5.33	2.6	Oxisol	Firman, 1994
50	Otway	-38.3	143.4	5.33	2.6	Oxisol	Douglas, 1977
51	Linton	-37.75	143.5	5.33	2.6	Oxisol	Hughes et al., 1999
52	Dercel	-37.9	143.9	5.33	2.6	Oxisol	Hughes et al., 1999
53	New South Wales	-32.15	151	5.33	2.6	Oxisol	Vann, 1963
54	McMurdo Dry Valleys	-77.5	162	3.9	2.2	Gelisol	Marchant et al., 1994; Bockheim and McLeod, 2008

## Sheet: Table 2 Lakes data
Location number	Location name	Latitude	Longitude	Oldest age (Ma)	Youngest age (Ma)	Sources of evidence for the lake	Length (km)	Width (km)	Description of the lakes shape	Orientation of the shape	Reconstructed depth (m)	Surface area (km2)	Reconstructed chemistry	Any inflows or outflows from the reconstructed lake	Additional notes on the lakes	Reference
1	Glenn's Ferry, ID	43.5	-116.3	3.8	2.4	Sediments, fauna	346	64	sausage	NW-SE		22144				Smith, 1981; Thompson, 1992
2	Tule Lake	41.98	-122.05	3	2.6	Sedimentology, topography, diatoms	127.1	49.5	Sausage	NE-SW		6291.45			Deep monomictic lake	Adam et al., 1990
3	Lake Russel	38	-119	2.8	2	Sedimentology, topography	80	35	Oval	NE-SW		2800				Reheis et al., 2002
4	Mono Lake	38	-118.55	3	2	Sedimentology, topography, genetics	45	25	Oval	E-W		1125				Knott et al., 2008; Phillips, 2008
5	Rhodes-Clayton-Fish Valleys, NV	38	-118	3.4	2.6	Topography, sedimentology	120	90	X	NW-SE		10800				Reheis et al., 2002
6	Owens Lake	36.55	-118	3	2	Sedimentology, topography, genetics	75	20	Sausage	NNW-SSE		1500				Knott et al., 2008; Phillips, 2008
7	Lake Manly	36.55	-117.05	3	2	Sedimentology, topography, genetics	130	10	Sausage	NW-SE		1300				Knott et al., 2008; Phillips, 2008
8	Panamint Lake	35.95	-117.2	3	2	Sedimentology, topography, genetics	46	6	Sausage	NNW-SSE		276			Wet periods only	Knott et al., 2008; Phillips, 2008
9	China-Scarles Lake	35.55	-117.4	3	2	Sedimentology, topography, genetics	40	20	Bloated H	E-W		800				Knott et al., 2008; Phillips, 2008
10	Kochn Lake_1	35.18	-117.85	3	2	Sedimentology, topography, genetics	8	5	Oval	NE-SW		40			Wet periods only	Knott et al., 2008; Phillips, 2008
11	Harper_1	34.65	-118	3	2	Sedimentology, topography, genetics	5	5	Circle	N/A		25			Wet periods only	Knott et al., 2008; Phillips, 2008
12	Harper_2	34.65	-117.9	3	2	Sedimentology, topography, genetics	2	2	Circle	N/A		4			Wet periods only	Knott et al., 2008; Phillips, 2008
13	Harper_3	34.7	-117.8	3	2	Sedimentology, topography, genetics	10	6	Sausage	N-S		60			Wet periods only	Knott et al., 2008; Phillips, 2008
14	Harper_4	34.45	-117.5	3	2	Sedimentology, topography, genetics	5	2	Sausage	wnw-ese		10			Wet periods only	Knott et al., 2008; Phillips, 2008
15	Kochn Lake_2	35.15	-117.4	3	2	Sedimentology, topography, genetics	5	2.5	Oval	NE-SW		12.5			Wet periods only	Knott et al., 2008; Phillips, 2008
16	Kochn Lake_3	35.1	-117.1	3	2	Sedimentology, topography, genetics	8	2	Sausage	E-W		16			Wet periods only	Knott et al., 2008; Phillips, 2008
17	South_Mojave	34.3	-117	3	2	Sedimentology, topography, genetics	2	2	Circle	N/A		4			Wet periods only	Knott et al., 2008; Phillips, 2008
18	Lake Tecopa	35.75	-116.25	3	2	Sedimentology, topography, genetics	14	8	Sausage	N-S		112			Wet periods only	Knott et al., 2008; Phillips, 2008
19	Lake Mojave	35.05	-116.1	3	2	Sedimentology, topography, genetics	20	6	Sausage	N-S		120			Wet periods only	Knott et al., 2008; Phillips, 2008
20	Lake Manix	34.85	-116.4	3	2	Sedimentology, topography, genetics	10	5	Sausage	ene-wsw		50			Wet periods only	Knott et al., 2008; Phillips, 2008
21	Bristol Lake	34.3	-115.65	3	2	Sedimentology, topography, genetics	14	6	Sausage	E-W		84			Wet periods only	Knott et al., 2008; Phillips, 2008
22	Cadiz Lake	34.15	-115.4	3	2	Sedimentology, topography, genetics	11	5	Sausage	nw-se		55			Wet periods only	Knott et al., 2008; Phillips, 2008
23	Danby Lake	34.05	-115.15	3	2	Sedimentology, topography, genetics	12	6	Sausage	NW-SE		72			Wet periods only	Knott et al., 2008; Phillips, 2008
24	Rita Blanca	35.719	-102.393	3.6	3	Sedimentology, fauna	9.66	5.63	Oval	N-S		54.3858			Varves, lake existed in moist climate regimes only	Anderson and Kirkland, 1969
25	Hueco Bolson, TX	30.9	-105.3	4.75	1.8	Sediments	170	34	triangle	NW-SE		5780			Shallow lake	Stuart and Willingham, 1984
26	Charo-Morelia	19.77	-101.08	5	3.2	Sedimentology, fish	40	20	Oval	ENE-WSW		800			During dry periods the large lake seperated into smaller shallow lakes	Israde-Alcantara and Garduño-Monroy, 1999
27	Bogota	5.17	-74.25	3	2.4	Sedimentology	50	50	Circle-ish	NE-SW		2500				Wijninga and Kuhry, 1993
28	Quillagua-Llamara Basin	-22.75	-69.5	3.6	2.6	Sedimentology	50	50	Circle-ish	N/A		2500	Saline lake		Evaporites present, lake was ephemeral, shallow	Sáez et al., 1999
29	Llancanelo	-35.6	-69.1	5.33	2.6	Sediments	50	25	Oval	N-S		1250	Saline		May have been larger. A permanent though very saline lagoon	Violante et al., 2010
30	Villarroya	42.13	-2.07	3.6	3	Sedimentology, ostracods	6	2	sausage	NW-SE	30	12			Possible short term cyclicity of 12, 6-7, 2-3 years. ENSO, NAO, QBO?	Muñoz et al., 2002; Anadón et al., 2008
31	Baza Basin	37.3	-1.5	5.33	1.8	Sedimentology	50	12	Oval	NNE-SSW		600			Evaporitic lake. During dry periods x = 20km y = 4km	Gibert et al., 2007
32	Puimoisson	43.85	6.12	4	2	Sedimentology	10	5	Oval	NE-SW	6	50			Depth is less than 6 metres	Blavoux et al., 1999
33	Wittershausen	51.78	10.1	3.2	2.4	Sedimentology	0.2	0.15	Oval	WNW-ESE	15	0.03			Anoxic bottom water	Ferguson and Knobloch, 1998
34	Valdarno Basin	43.57	11.47	3.12	2.6	Sedimentology	6	2	Oval	NNE-SSW		12			Precession controlled, complex reaction to eccentricity	Ielpi, 2012
35	Tiberino Basin	42.78	12.4	3.6	2.6	Sedimentology	50	12	Sausage	NNW-SSE	100	600			Meromictic lake	Basilici, 1997
36	Fucino Basin	41.8	13.5	3.6	2.6	Sedimentology	10	5	Sausage	WNW-ESE		50		N, S		Cavinato et al., 2002
37	Daccian Basin	44.33	23.8	3	2.6	Sedimentology	125	125	Circle-ish	N/A		15625			Eccentricity controlled	Ţicleanu and Diaconiţǎ, 1997; van Vugt et al., 2001
38	Eskisehir	39.5	30.5	5.33	2.6	Sedimentology	70	50	Oval	WNW-ESE		3500			Semi arid-arid environment	Yeniyol, 2012
39	Cankiri-Bayat	40.5	34	5	3	Sedimentology	80	40	Oval	E-W		3200		ENE, WSW	Evaporitic lake	Karadenizli, 2011
40	Ihlara-Selime	38.28	34.33	4.3	2.6	Sedimentology, diatoms	80	20	Sausage	N-S		1600		N, S	Shallow mesotrophic lake	Gürel and Yıldız, 2007
41	Isfahan_1	30.35	50.5	5.33	2.6	Sedimentology	5	5	Circle	N/A		25				Hojati et al., 2012
42	Isfahan_2	30.3	50.5	5.33	2.6	Sedimentology	40	25	Oval	?		1000				Hojati et al., 2012
43	Isfahan_3	30.1	50.2	5.33	2.6	Sedimentology	25	10	?	?		250				Hojati et al., 2012
44	Udmurtian	56.2	52.8	3.4	3	Sediments	40	10	oval	N/A		400			Unstable hydrology	Pisareva, 2006
45	Suerkuli	38.7	90.5	5.3	3.2	Sedimentology	120	40	Oval	ENE-WSW		4800			Tectonics destroyed lake	Chang et al., 2012
46	Ban Pa Muang	18.15	99.4	4	2.6	Sedimentology, diatoms	9	4.7	Triangle	N-S-W		42.3				Owen and Utha-aroon, 1999
47	Ban Phae-Oun-Na Tom	18.18	99.5	4	2.6	Sedimentology	12.9	1	Sausage	N-S		12.9				Owen and Utha-aroon, 1999
48	Ban Phi Chai	18.33	99.5	4	2.6	Sedimentology, diatoms	2.7	0.5	oval	NE-SW		1.35			Main ID 14, 15 & 16 might have all been one large lake x=25km y=11.8km	Owen and Utha-aroon, 1999
49	Qinghai	29	102.25	4.2	2.9	Sediments	220	40	sausage	N-S		8800			Maybe multiple small lakes	Zhizhong et al., 2008
50	Baikal	53.334	108.074	3.4	2.4	Sedimentology	600	68	Banana	NNE-SSW	1500	40800			Change in sedimentology at 3.15 Ma due to tectonics	Müller et al., 2001
51	Yushe	37	113	3.2	2.05	Sediments	10	10	circle	N/A		100			Varves	Liu et al., 2002
52	Zhejiang	29.333	121.567	4.12	2.9	Sedimentology, palaeontology	80	80	?circular	N/A	6	6400				Li et al., 2010
53	El'gygytgun	67.5	172.1	3.58	2.6	Sediments, topography	18	18	Circle	N/A	1400	324				Glushkova and Smirnov, 2007
54	Souss Basin	30.4	-9	3.2	1.8	Sedimentology	50	20	Oval	ENE-WSW		1000				Aït Hssaine and Bridgland, 2009
55	Gulf of Sirt_2	29.1	17.1	4	2	DEM	110	20	L-shaped, long edge E-W	E-W		2200		In: south,		Drake et al., 2008
56	Gulf of Sirt_1	27	17.8	4	2	DEM	100	30	Sausage	NNW-SSE		3000		In: West, Out: East		Drake et al., 2008
57	Fazzan_2	26.5	18.7	4	2	DEM	75	25	Semi-circle, flat edge to SSW	WNW-ESE		1875		In: West, Out: NNE		Drake et al., 2008
58	Al Kufrah	29.6	23.8	4	2	DEM	200	25	Sausage	E-W		5000		In: South, Out: West		Drake et al., 2008
59	Fazzan	25	27	4	2	DEM, Sedimentology	396	386	Rough square	N/A	500	152856		One in NE corner flowing NE, One on east side flowing E then N	Largest extent during humid periods of the Pliocene	Drake et al., 2008
60	Lake Chad_WET	14.3	16.5	3.5	3	Sedimentology, DEM, fauna	876	510	Amorphous almost "1" shaped	NE-SW	125	446760		SE, SW, E	Depth is maximum, large parts of the lake could have been relatively shallow	Schuster et al., 2009; Otero et al., 2010
61	Lake Chad_DRY	15	17	3.5	3	Sedimentology, Lake edge sediments, DEM, fauna	758	391	Backwards C-shaped	NE-SW	85	296378		SW, SE, E	Large parts of the lake could have been shallower than maximum depth	Schuster et al., 2009; Otero et al., 2010
62	Lake Sudd	7	29	5.33	2.6	Sedimentology, topography	906	406	Oval	NW-SE		367836			Part saline (north part), WET periods. During dry periods x = 29km y = 29km	Salama et al., 1987
63	Hadar	11.17	40.6	3.5	3.15	Sediments Ostracods	38	18	sausage	NE-SW		684			High salinity and dissolved nutrients, absent during dry climates	Tiercelin, 1986; Campisano and Feibel, 2008
64	Lake Zaire	-0.268	20.029	5.33	2.6	Topography	1316.6	1510.2	Circular	N/A		1.98833e+06				Peters and O'Brien, 2001; Goudie, 2005
65	Baringo-Tugen Hills	0.5	36	3.8	2.5	Sediments	20	20	Circleish	N/A		400				Deino et al., 2006
66	Tanganyika	-6	30	3.6	1.1	Seismics, sediments	640	50	Sausage	NNW-SSE		32000			Deep lake	Cohen et al., 1997
67	Lake Malawi	-11.7	34.5	5.33	2.6	Sediments	540	60	Sausage	N-S		32400			deep lake	Dixey, 1927
68	Okavango Lake	-18.85	23.75	5	2	Sedimentology, topography	632	161	Sausage	NE-SW		101752			Endoreic, shallow, maximum size during wet climate cycles	Ringrose et al., 2002; 2005
69	Makgadikgadi Lake	-20.5	25.25	5	2	Sedimentology, topography	385	246	Oval	NE-SW		94710			Endoreic, shallow, maximum size during wet climate cycles	Ringrose et al., 2002; 2005
70	Lake Yallalie	-30.5	114.717	3.59	2.6	Sedimentology	6.2	6.2	Circular	N/A	110	38.44			Laminated, variable sedimentology thought to reflect humidity	Dodson and Ramrath, 2001
71	Lake Amadeus	-24.75	130.8	5	2.6	Sediments	120	40	Sausage	NW-SE		4800	Saline to freshwater	NW, SE?	Possibly fed Lake Eyre. Maybe ephemeral. NO evidence for aeolian sedimentation, therefore vegetated surroundings	Chen et al., 1993
72	Lake Eyre	-28.8	137.3	5.33	2.6	Sediments, pollen	280	247	Oval	N-S		69160	Freshwater to saline		Shallow lake Evaporites present, Lit ID 217	Alley, 1998; Martin, 2006
73	Tarkarooloo	-30.45	140	5.33	2.6	Sediments, topography, ostracods, gastropods	200	100	Vase	NNE-SSW		20000		All sides!	Variable salinity, more freshwater input than today, shallow	Callen, 1977

## Sheet: References
Abbott, P.L., 1981. Cenozoic paleosols San Diego area, California. CATENA 8, 223-237.
Adam, D.P., Bradbury, J.P., Rieck, H.J. and Sarna-Wojcicki, A.M., 1990. Environmental changes in the Tule Lake Basin, Siskiyou and Modoc Counties, California, from 3 to 2 Million years before present. USGS Bulletin 1933, 1-13.
Aït Hssaine, A., Bridgland, D., 2009. Pliocene–Quaternary fluvial and aeolian records in the Souss Basin, southwest Morocco: A geomorphological model. Global and Planetary Change 68, 288-296.
Alley, N.F., 1998. Cainozoic stratigraphy, palaeoenvironments and geological evolution of the Lake Eyre Basin. Palaeogeography, Palaeoclimatology, Palaeoecology 144, 239-263.
Anadón, P., Utrilla, R., Vázquez, A., Martín-Rubio, M., Rodriguez-Lázaro, J., Robles, F., 2008. Paleoenvironmental evolution of the Pliocene Villarroya Lake, northern Spain, from stable isotopes and trace-element geochemistry of ostracods and molluscs. Journal of Paleolimnology 39, 399-419.
Anderson, R.Y., Kirkland, D.W., 1969. Paleoecology of an Early Pleistocene lake on the High Plains of Texas. The Geological Society of America, Memoir 113, 1-13.
Basilici, G., 1997. Sedimentary facies in an extensional and deep-lacustrine depositional system: the Pliocene Tiberino Basin, Central Italy. Sedimentary Geology 109, 73-94.
Bechtel, A., Sachsenhofer, R.F., Markic, M., Gratzer, R., Lücke, A. and Püttmann, W., 2003. Paleoenvironmental implications from biomarker and stable isotope investigations on the Pliocene Velenje lignite seam (Slovenia). Organic Geochemistry 34, 1277-1298.
Blavoux, B., Dubar, M., Daniel, M., 1999. Indices isotopiques (13C et 18O) d'un important refroidissement du climat à la fin du Pliocène (formation lacustre de Puimoisson, Alpes-de-Haute-Provence, France): Isotopic indices (13C and 180) of an imponant cooling at the end of the Pliocene (Puimoisson lacustrine formation, Alpes-de-Haute-Provence, France). Comptes Rendus de l'Académie des Sciences - …
Bockheim, J.G., McLeod, M., 2008. Soil distribution in the McMurdo Dry Valleys, Antarctica. Geoderma 144, 43-49.
Callen, R.A., 1977. Late Cainozoic environments of part of northeastern South Australia. Journal of Geological Society of Australia 24, 151-169.
Campisano, C.J., Feibel, C.S., 2008. Depositional environments and stratigraphic summary of the Pliocene Hadar Formation at Hadar, Afar Depression, Ethiopia. The Geological Society of America Special Paper 446, 179-201.
Cavinato, G.P., Carusi, C., Dall'Asta, M., Miccadei, E., Piacentini, T., 2002. Sedimentary and tectonic evolution of Plio–Pleistocene alluvial and lacustrine deposits of Fucino Basin (central Italy). Sedimentary Geology 148, 29-59.
Chang, H., Ao, H., An, Z., Fang, X., Song, Y. and Qiang, X., 2012. Magnetostratigraphy of the Suerkuli Basin indicates Pliocene (3.2 Ma) activity of the middle Altyn Tagh Fault, northern Tibetan Plateau. Journal of Asian Earth Sciences 44, 169-175.
Chen, X.Y., Bowler, J.M. and Magee, J.W., 1993. Late Cenozoic stratigraphy and hydrologic history of Lake Amadeus, a central Australian playa. Australian Journal of Earth Sciences 40, 1-14.
Cohen, A.S., Lezzar, K.E., Tiercelin, J.J. and Soreghan, M., 1997. New palaeogeographic and lake-level reconstructions of Lake Tanganyika: implications for tectonic, climatic and biological evolution in a rift lake. Basin Research 9, 107-132.
Deino, A.L., Kingston, J.D., Glen, J.M., Edgar, R.K. and Hill, A., 2006. Precessional forcing of lacustrine sedimentation in the late Cenozoic Chemeron Basin, Central Kenya Rift, and calibration of the Gauss/Matuyama boundary. Earth and Planetary Science Letters 247, 41-60.
Ding, Z.L., Sun, J.M., Liu, T.S., Zhu, R.X., Yang, S.L., Guo, B., 1998. Wind-blown origin of the Pliocene red clay formation in the central Loess Plateau, China. Earth and Planetary Science Letters 161, 135-143.
Dixey, F., 1927. The Tertiary and Post-Tertiary Lacustrine Sediments of the Nyasan Rift-Valley. Quarterly Journal of the Geological Society 83, 432-442.
Dodson, J.R., Ramrath, A., 2001. An Upper Pliocene lacustrine environmental record from south-Western Australia - preliminary results. Palaeogeography, Palaeoclimatology, Palaeoecology 167, 309-320.
Douglas, I.C., 1977. The Geology of the Otway Region, southern Victoria. Proceedings of the Royal Society of Victoria 89, 19-26.
Drake, N.A., El-Hawat, A.S., Turner, P., Armitage, S.J., Salem, M.J., White, K.H. and McLaren, S., 2008. Palaeohydrology of the Fazzan Basin and surrounding regions: The last 7 million years. Palaeogeography, Palaeoclimatology, Palaeoecology 263, 131-145.
Ferguson, D.K., Knobloch, E., 1998. A fresh look at the rich assemblage from the Pliocene sink-hole of Willershausen, Germany. Review of Palaeobotany and Palynology 101, 271-286.
Firman, J.B., 1994. Paleosols in laterite and silcrete profiles Evidence from the South East Margin of the Australian Precambrian Shield. Earth-Science Reviews 36, 149-179.
Fujioka, T., Chappell, J., Honda, M., Yatsevich, I., Fifield, K., Fabel, D., 2005. Global cooling initiated stony deserts in central Australia 2–4 Ma, dated by cosmogenic 21Ne-10Be. Geology 33, 993-996.
Genise, J.F., 1997. A fossil termite nest from the Marplatan stage (late Pliocene) of Argentina: palaeoclimatic indicator. Palaeogeography, Palaeoclimatology, Palaeoecology 136, 139-144.
Gerasimenko, N., 1993. Vegetation development cycles of the Ukrainian forest-steppe zone in the Middle - Late Pliocene. In: Planderova, E., Konzalova, M., Kvacek, Z., Sitar, V., Snopkova, P. and Suballyova, D. (Eds.), Paleofloristic and paleoclimatic changes during Cretaceous and Tertiary. Geologicky Ustav Dionyza Stura, Bratislava, pp. 199-204.
Gibert, L., Ortí, F., Rosell, L., 2007. Plio-Pleistocene lacustrine evaporites of the Baza Basin (Betic Chain, SE Spain). Sedimentary Geology 200, 89-116.
Glushkova, O., Smirnov, V., 2007. Pliocene to Holocene geomorphic evolution and paleogeography of the El’gygytgyn Lake region, NE Russia. Journal of Paleolimnology 37, 37-47.
Goudie, A.S., 2005. The drainage of Africa since the Cretaceous. Geomorphology 67, 437-456.
Graef, F., Singer, A., Stahr, K. and Jahn, R., 1997. Genesis and diagenesis of paleosols from Pliocene volcanics on the Golan Heights. CATENA 30, 149-167.
Günster, N. and Skowronek, A., 2001. Sediment–soil sequences in the Granada Basin as evidence for long- and short-term climatic changes during the Pliocene and Quaternary in the Western Mediterranean. Quaternary International 78, 17-32.
Gürel, A., Kadir, S., 2006. Geology, mineralogy and origin of clay minerals of the Pliocene fluvial-lacustrine deposits in the Cappadocian Volcanic Province, central Anatolia, Turkey. Clays and Clay Minerals 54, 555-570.
Gürel, A., Yıldız, A., 2007. Diatom communities, lithofacies characteristics and paleoenvironmental interpretation of Pliocene diatomite deposits in the Ihlara–Selime plain (Aksaray, Central Anatolia, Turkey). Journal of Asian Earth Sciences 30, 170-180.
Gustavson, T.C., 1991. Buried Vertisols in lacustrine facies of the Pliocene Fort Hancock Formation, Hueco Bolson, West Texas and Chihuahua, Mexico. Geological Society of America Bulletin 103, 448-460.
Helgren, D.M. and Butzer, K.W., 1977. Paleosols of the southern Cape Coast, South Africa: Implications for laterite definition, genesis, and age. Geographical Review 67, 430-445.
Hojati, S., Khademi, H., Arocena, J.M., Cano, A.F., Ayoubi, S., 2012. Chronostratigraphic distribution and genesis of palygorskite in Tertiary sediments of the Isfahan region, central Iran. Clay Minerals 47, 11-29.
Hughes, M.J., Carey, S.P. and Kotsonis, A., 1999. Lateritic weathering and secondary gold in the Victorian Gold Province. Regolith 98, 155-172.
Icole, M., 1970. Une nouvelle methode pour la paleopedologie du Pliocene et du Villafranchien des Pyrenees centrales. Bulletin de l'Association française pour l'etude du Quaternaire 1970, 135-143.
Ielpi, A., 2012. Orbitally-driven climate forcing in late Pliocene lacustrine siderite-rich clastic rhythms (Upper Valdarno Basin, Northern Apennines, Italy). Palaeogeography, Palaeoclimatology, Palaeoecology 331-332, 119-135.
Israde-Alcantara, I., Garduño-Monroy, V.H., 1999. Lacustrine record in a volcanic intra-arc setting: the evolution of the Late Neogene Cuitzeo basin system (central-western Mexico, Michoacán). Palaeogeography, Palaeoclimatology, Palaeoecology 151, 209-227.
Karadenizli, L., 2011. Oligocene to Pliocene palaeogeographic evolution of the Çankırı-Çorum Basin, central Anatolia, Turkey. Sedimentary Geology 237, 1-29.
Kelepertsis, A., 2002. Mineralogy and geochemistry of the pliocene iron-rich laterite in the Vatera area, Lesvos Island, Greece and its genesis. Chinese Journal of Geochemistry 21, 193-205.
Kleinert, K., Strecker, M.R., 2001. Climate change in response to orographic barrier uplift: Paleosol and stable isotope evidence from the late Neogene Santa María basin, northwestern Argentina. Geological Society of America Bulletin 113, 728-742.
Knott, J.R., Machette, M.N., Klinger, R.E., Sarna-Wojcicki, A.M., Liddicoat, J.C., Tinsley III, J.C., David, B.T., Ebbs, V.M., 2008. Reconstructing late Pliocene to middle Pleistocene Death Valley lakes and river systems as a test of Pupfish (Cyprinodontidae) dispersal hypotheses. The Geological Society of America Special Paper 439, 1-26.
Lenoble, A., 1949. Les depots lacustres Pliocenes-Pleistocenes de L'Ankaratra (Madagascar): Etude geologique. Annales Geologiques du Service des Mines 18, 9-82.
Li, J.-F., Hu, Y.-Q., Ferguson, D., Wang, Y.-F., Li, C.-S., 2010. An Early Pliocene lake and its surrounding vegetation in Zhejiang, East China. Journal of Paleolimnology 43, 751-769.
Liu, G., Leopold, E.B., Liu, Y., Wang, W., Yu, Z., Tong, G., 2002. Palynological record of Pliocene climate events in North China. Review of Palaeobotany and Palynology 119, 335-340.
Mabesoone, J.M. and Lobo, H.R.C., 1980. Paleosols as stratigraphic indicators for the cenozoic history of northeastern Brazil. CATENA 7, 67-78.
Mack, G.H., Seager, W.R., Leeder, M.R., Perez-Arlucea, M. and Salyards, S.L., 2006. Pliocene and Quaternary history of the Rio Grande, the axial river of the southern Rio Grande rift, New Mexico, USA. Earth-Science Reviews 79, 141-162.
Marchant, D.R., Denton, G.H., Bockheim, J.G., Wilson, S.C., Kerr, A.R., 1994. Quaternary changes in level of the upper Taylor Glacier, Antarctica: implications for paleoclimate and East Antarctic Ice Sheet dynamics. Boreas 23, 29-43.
Martin, H.A., 2006. Cenozoic climatic change and the development of the arid vegetation in Australia. Journal of Arid Environments 66, 533-563.
Mats, V.D., Lomonosova, T.K., Vorobyova, G.A. and Granina, L.Z., 2004. Upper Cretaceous–Cenozoic clay minerals of the Baikal region (eastern Siberia). Applied Clay Science 24, 327-336.
Müller, J., Oberhänsli, H., Melles, M., Schwab, M., Rachold, V. and Hubberten, H.W., 2001. Late Pliocene sedimentation in Lake Baikal: implications for climatic and tectonic change in SE Siberia. Palaeogeography, Palaeoclimatology, Palaeoecology 174, 305-326.
Muñoz, A., Ojeda, J., Sánchez-Valverde, B., 2002. Sunspot-like and ENSO/NAO-like periodicities in lacustrine laminated sediments of the Pliocene Villarroya Basin (La Rioja,Spain). Journal of Paleolimnology 27, 453-463.
Osterrieth, M.L., Martínez, G.A., 1993. Paleosols on Late Cainozoic loessic sequences in the northeastern side of Tandilia Range, buenos aires, Argentina. Quaternary International 17, 57-65.
Otero, O., Pinton, A., Mackaye, H.T., Likius, A., Vignaud, P., Brunet, M., 2010. The early/late Pliocene ichthyofauna from Koro-Toro, Eastern Djurab, Chad. Geobios 43, 241-251.
Owen, R.B., Utha-aroon, C., 1999. Diatomaceous sedimentation in the Tertiary Lampang Basin, Northern Thailand. Journal of Paleolimnology 22, 81-95.
Paepe, R., Mariolakos, I., Van Overloop, E., Nassopoulou, S., Hus, J., Hatziotou, M., Markopoulos, T., Manutsoglu, E., Livaditis, G. and Sabot, V., 2004. Quaternary soil-geological stratigraphy in Greece. Bulletin of the Geological Society of Greece 36, 856-863.
Peryam, T.C., Dorsey, R.J., Bindeman, I., Housen, B., Palandri, J., 2008. Preliminary Pliocene-Pleistocene Stable-Isotope and Paleosol Data From the Fish Creek- Vallecito Basin, Southern California: Insights Into Paleoclimate From Pedogenic Carbonate. American Geophysical Union, Fall Meeting 2008. American Geophysical Union, Washington DC, pp. T11A-1842.
Peters, C.R. and O'Brien, E.M., 2001. Palaeo-lake Congo: Implications for Africa's Late Cenozoic climate - some unanswered questions. Palaeoecology of Africa 27, 11-18.
Phillips, F.M., 2008. Geological and hydrological history of the paleo-Owens River drainage since the late Miocene. The Geological Society of America Special Paper 439, 115-150.
Pisareva, V.V., 2006. The Akchagylian flora and vegetation of the Udmurtian Kama River region. Paleontological Journal 40, s648-s655.
Quade, J., Solounias, N. and Cerling, T.E., 1994. Stable isotopic evidence from paleosol carbonates and fossil teeth in Greece for forest or woodlands over the past 11 Ma. Palaeogeography, Palaeoclimatology, Palaeoecology 108, 41-53.
Reheis, M.C., Sarna-Wojcicki, A.M., Reynolds, R.L., Repenning, C.A., Mifflin, M.D., 2002. Pliocene to middle Pleistocene lakes in the Western Great Basin: Ages and connections. In: Hershler, R., Madsen, D.B., Currey, D.R. (Eds.), Great basin aquatic systems history. Smithsonian Institution Press, Washington D.C., pp. 53-108.
Ringrose, S., Huntsman-Mapila, P., Basira Kampunzu, A., Downey, W., Coetzee, S., Vink, B., Matheson, W. and Vanderpost, C., 2005. Sedimentological and geochemical evidence for palaeo-environmental change in the Makgadikgadi subbasin, in relation to the MOZ rift depression, Botswana. Palaeogeography, Palaeoclimatology, Palaeoecology 217, 265-287.
Ringrose, S., Kampunzu, A.B., Vink, W., Matheson, W. and Downe, W.S., 2002. Origin and palaeo-environments of calcareous sediments in the Moshaweng dry valley, southeast Botswana. Earth Surface Processes and Landforms 27, 591-611.
Sáez, A., Cabrera, L., Jensen, A. and Chong, G., 1999. Late Neogene lacustrine record and palaeogeography in the Quillagua–Llamara basin, Central Andean fore-arc (northern Chile). Palaeogeography, Palaeoclimatology, Palaeoecology 151, 5-37.
Salama, R.B., 1987. The evolution of the River Nile. The buried saline rift lakes in Sudan - I. Bahr El Arab Rift, the Sudd buried saline lake. Journal of African Earth Sciences 6, 899-913.
Sangode, S.J. and Bloemendal, J., 2004. Pedogenic transformation of magnetic minerals in Pliocene–Pleistocene palaeosols of the Siwalik Group, NW Himalaya, India. Palaeogeography, Palaeoclimatology, Palaeoecology 212, 95-118.
Schuster, M., Duringer, P., Ghienne, J.-F., Roquin, C., Sepulchre, P., Moussa, A., Lebatard, A.-E., Mackaye, H.T., Likius, A., Vignaud, P. and Brunet, M., 2009. Chad Basin: Paleoenvironments of the Sahara since the Late Miocene. Comptes Rendus Geoscience 341, 603-611.
Smith, G.A., Wang, Y., Cerling, T.E., Geissman, J.W., 1993. Comparison of a paleosol-carbonate isotope record to other records of Pliocene-early Pleistocene climate in the western United States. Geology 21, 691-694.
Smith, G.R., 1981. Late Cenozoic Freshwater Fishes of North America. Annual Review of Ecology and Systematics 12, 163-193.
Stuart, C.J., Willingham, D.L., 1984. Late tertiary and quaternary fluvial deposits in the Mesilla and Hueco bolsons, El Paso area, Texas. Sedimentary Geology 38, 1-20.
Thompson, R.S., 1992. Palynological data from a 989-FT (301-M) core of Pliocene and Early Pleistocene sediments from Bruneau, Idaho. USGS Open File Report 92-713, 1-28.
Ţicleanu, N., Diaconiţǎ, D., 1997. The main coal facies and lithotypes of the Pliocene coal basin, Oltenia, Romania. Geological Society, London, Special Publications 125, 131-139.
Tiercelin, J.J., 1986. The Pliocene Hadar Formation, Afar depression of Ethiopia. Geological Society, London, Special Publications 25, 221-240.
van Vugt, N., Langereis, C.G., Hilgen, F.J., 2001. Orbital forcing in Pliocene–Pleistocene Mediterranean lacustrine deposits: dominant expression of eccentricity versus precession. Palaeogeography, Palaeoclimatology, Palaeoecology 172, 193-205.
Vann, J.H., 1963. Developmental Processes in Laterite Terrain in Amapa. Geographical Review 53, 406-417.
Violante, R., Osella, A., Vega, M.d.l., Rovere, E. and Osterrieth, M., 2010. Paleoenvironmental reconstruction in the western lacustrine plain of Llancanelo Lake, Mendoza, Argentina. Journal of South American Earth Sciences 29, 650-664.
Wijninga, V.M. and Kuhry, P., 1993. Late Pliocene paleoecology of the Guasca Valley (Cordillera Oriental, Colombia). Review of Palaeobotany and Palynology 78, 69-127.
Wu, N., Pei, Y., Lu, H., Guo, Z., Li, F., Liu, T., 2006. Marked ecological shifts during 6.2–2.4 Ma revealed by a terrestrial molluscan record from the Chinese Red Clay Formation and implication for palaeoclimatic evolution. Palaeogeography, Palaeoclimatology, Palaeoecology 233, 287-299.
Wynn, J.G., 2000. Paleosols, stable carbon isotopes, and paleoenvironment interpretation of Kanapoi, Northern Kenya. Journal of Human Evolution 39, 411-432.
Yang, S., Ding, Z., 2010. Drastic climatic shift at ∼2.8&#xa0;Ma as recorded in eolian deposits of China and its implications for redefining the Pliocene-Pleistocene boundary. Quaternary International 219, 37-44.
Yeniyol, M., 2012. Geology and mineralogy of a sepiolite-palygorskite occurrence from SW Eskisehir (Turkey). Clay Minerals 47, 93-104.
Zhizhong, Z., Yansong, Q., Shubing, W., Haitao, Y.A.O., Yan, W., Chaozhu, L.I., Jianli, F.U., Zongxiu, L.I.U., Mingze, L.I., Qi, M., Fuchu, J., 2008. Late Cenozoic Geology and Paleo-environment Change in the Eastern Edge of Qinghai-Xizang Plateau. Acta Geologica Sinica - English Edition 82, 959-966.
